# Supplementary material for: Furan fatty acids efficiently rescue brain cells from cell death induced by oxidative stress
Source: Royal Society of Chemistry journal article supplement (doi:10.1039/c3fo60094g), 2013-01-01
Supplement: c3fo60094g.pdf [file c3fo60094g.pdf]

Supplementary information

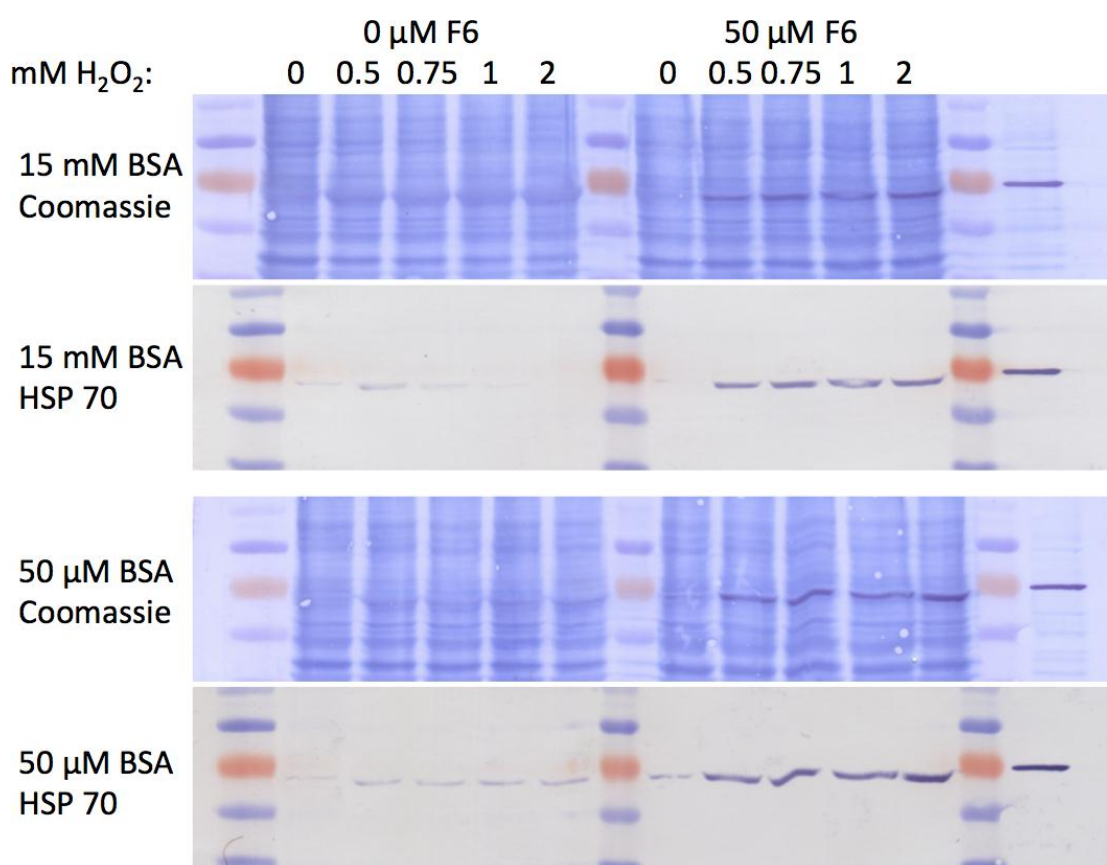

Fig.1 suppl.

Loading controls showing that equal amounts of protein are loaded when investigating the different Hsp70 levels produced in the absence and presence of 50 μM F6 and for hydrogen peroxide levels ranging from 0-2 mM

Data are shown for experiments where C6 cells were pre-treated with F6 either mixed with 15 mM BSA or 50 μM BSA.

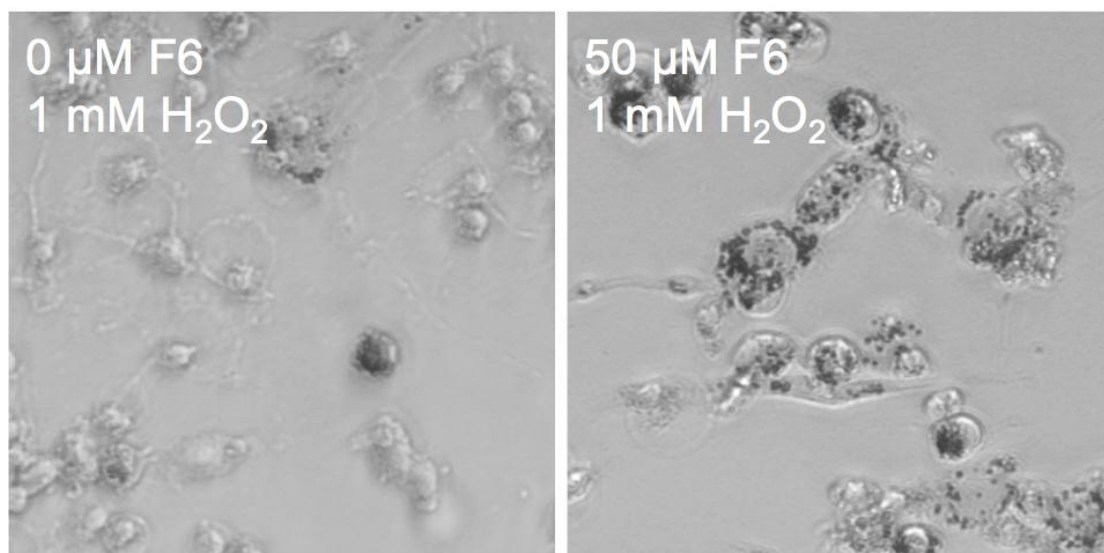

Fig.2 suppl

C6 cells shown at high magnification (2\* as compared to Fig.2, series 1A through 7B) showing rounded and apoptotic cells at 1 mM  $\text{H}_2\text{O}_2$  without F6. In the presence of F6 still extended (healthy) cells can be observed.
